## GEOMETRY OF RANKED NEAREST NEIGHBOUR INTERCHANGE SPACE OF PHYLOGENETIC TREES

LENA COLLIENNE<sup>1</sup>, KIERAN ELMES<sup>1</sup>, MAREIKE FISCHER<sup>2</sup>, DAVID BRYANT<sup>3</sup>,  
AND ALEX GAVRYUSHKIN<sup>1</sup>, ✉

**ABSTRACT.** In this paper we study the graph of ranked phylogenetic trees where the adjacency relation is given by a local rearrangement of the tree structure. Our work is motivated by tree inference algorithms, such as maximum likelihood and Markov Chain Monte Carlo methods, where the geometry of the search space plays a central role for efficiency and practicality of the optimisation. We hence focus on understanding the geometry of the space (graph) of ranked trees, the so-called ranked nearest neighbour interchange (RNNI) graph. For example, we find the radius and diameter of the space exactly, improving the best previously known estimates. Since the RNNI graph is a generalisation of the classical nearest neighbour interchange (NNI) graph to ranked phylogenetic trees, we compare geometric and algorithmic properties of the two graphs. Surprisingly, we discover that both geometric and algorithmic properties of RNNI and NNI are quite different. For example, we establish convexity of certain natural subspaces in RNNI, which are not convex in NNI. Furthermore, our results suggest that the complexity of computing distances in the two graphs is different.

The nearest neighbour interchange (NNI) graph, defined on the set of phylogenetic trees with adjacency relation given by the interchange operation of two sister clades (subtrees), has been known in mathematical biology literature for nearly 50 years (Robinson 1971; Moore, Goodman and Barnabas 1973). Considered with the metric given by the length of a shortest path (graph-distance), this graph becomes a metric space. Its geometry has been extensively studied (Dasgupta et al. 2000; Li, Tromp and Zhang 1996; Gordon, Ford and St John 2013; Jong, McLeod and Steel 2016). An important property of the NNI graph is that computing distances is NP-hard (Dasgupta et al. 2000). As a result no algorithm exists to compute the distance in practical time. A consequence is that tree search and sampling algorithms pose a significant challenge even for moderately sized trees (Whidden and Matsen 2016).

More recent advances in computational phylogenetics introduce various classes of molecular clock models (Yoder and Yang 2000; Drummond, Ho et al. 2006; Drummond and Suchard 2010) and made computational inference of phylogenetic time-trees possible (Ronquist and Huelsenbeck 2003; Bouckaert et al. 2018; Hadfield et al. 2018). However, mathematical challenges that come with this seemingly

---

<sup>1</sup>DEPARTMENT OF COMPUTER SCIENCE, UNIVERSITY OF OTAGO, NEW ZEALAND

<sup>2</sup>INSTITUTE OF MATHEMATICS AND COMPUTER SCIENCE, UNIVERSITY OF GREIFSWALD, GERMANY

<sup>3</sup>DEPARTMENT OF MATHEMATICS AND STATISTICS, UNIVERSITY OF OTAGO, NEW ZEALAND

*E-mail addresses:* [lena.collienne@postgrad.otago.ac.nz](mailto:lena.collienne@postgrad.otago.ac.nz), [kelmes@cs.otago.ac.nz](mailto:kelmes@cs.otago.ac.nz),  
[email@mareikefischer.de](mailto:email@mareikefischer.de), [david.bryant@otago.ac.nz](mailto:david.bryant@otago.ac.nz), ✉[alex@biods.org](mailto:alex@biods.org).

*Date:* 20th December 2019.

inessential change in parametrisation (genomic distance VS time distance) of trees have only recently been brought to attention (Gavryushkin and Drummond 2016). These differences motivated Gavryushkin, Whidden and Matsen (2018) to propose an extension of the NNI graph to the class of discrete time-trees. The simplest such extension introduces the RNNI graph on the set of ranked phylogenetic trees. Considered with the graph-distance RNNI becomes a metric space and inherits the geometric and algorithmic challenges that the NNI space has been traditionally facing. Surprisingly, most of them cannot be settled by directly translating results or applying techniques developed for NNI (Gavryushkin, Whidden and Matsen 2018).

In this paper, we consider the RNNI space on ranked phylogenetic trees with all taxa being of equal rank. An example of such a tree is depicted in Figure 1. In the terminology of (Gavryushkin, Whidden and Matsen 2018), the space considered in this paper is the space of ranked ultrametric phylogenetic trees (RNNI<sub>u</sub> in their notations). We postpone accurate definitions until later in this section.

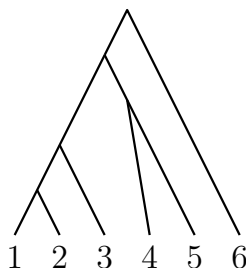

FIGURE 1. A ranked tree with 6 taxa.

In line with the research programme proposed in (Gavryushkin, Whidden and Matsen 2018), we investigate the geometry and algorithmic complexity of the RNNI space. Specifically, in this paper we establish the exact radius and diameter of the space (Section 2.2). We also show that the subset of caterpillar trees is convex in RNNI (Section 2.1), thus settling one of the open problems proposed in (Gavryushkin, Whidden and Matsen 2018). For establishing these geometric properties we are using algorithms that will be introduced in Section 1. We will in particular provide an approximate algorithm that computes exact distances for small trees. The question of whether there exists a polynomial algorithm for computing the RNNI distance remains an open problem.

In the rest of this chapter we formally introduce the terminology used in this paper.

A *ranked phylogenetic tree* is a pair consisting of a rooted binary phylogenetic tree  $T$  on the set  $X = \{1, \dots, n\}$  of *taxa* for  $n \in \mathbb{N}$ , and a (total) rank function that maps all leaves of  $T$  to 0, all internal nodes of  $T$  onto elements of the set  $\{1, \dots, n - 1\}$ , and respects the partial order on the nodes given by the tree. The latter means that if  $u$  and  $v$  are two internal nodes of  $T$  such that there exists a path from a taxon  $x \in X$  to the root which first passes through  $u$  and then through  $v$  then  $\text{rank}(u) < \text{rank}(v)$ . Ranked trees  $(T_1, \text{rank}_1)$  and  $(T_2, \text{rank}_2)$  are different if trees  $T_1$  and  $T_2$  are different or  $T_1 = T_2$  and  $\text{rank}_1 \neq \text{rank}_2$ . Since all trees in this

paper are ranked trees, we will abuse the notation and drop the rank function from the notation. We will also simply say trees to mean ranked phylogenetic trees. For a tree  $T$ , we will use  $\text{rank}_T$  to refer to its ranking. A ranked tree  $T$  without its leaf labels will be called *tree topology*.

Our definition of a ranked tree implies a natural notion of edge length – we call  $|\text{rank}_T(v) - \text{rank}_T(u)|$  the length of an edge  $(u, v)$ . We assume that edges of trees are undirected, so  $(u, v) = (v, u)$ .

Now we are ready to introduce the tree space which is the subject of study in this paper, the RNNI graph.

The vertex set of the RNNI graph is the set of all ranked trees on  $n$  taxa. We introduce two types of operation (RNNI *moves*) on trees (see Figure 2) and say that two trees are adjacent in the RNNI graph if they are connected by an operation of either type. The first type of operation is called a *rank move* and defined by swapping the ranks of two internal nodes that are not adjacent in the tree. Formally, if  $u$  and  $v$  are nodes of a tree  $T$  such that  $|\text{rank}_T(u) - \text{rank}_T(v)| = 1$  and  $(u, v)$  is not an edge in  $T$  then the tree  $R$  obtained from  $T$  by only changing  $\text{rank}_R(u) = \text{rank}_T(v)$  and  $\text{rank}_R(v) = \text{rank}_T(u)$  is said to be obtained by a rank move. The second type of operation is called an *NNI move* and defined in the usual way, that is, two trees  $T$  and  $R$  are said to be connected by an NNI move if there exist internal edges  $e$  in  $T$  and  $f$  in  $R$  both of length one such that the trees obtained by shrinking  $e$  and  $f$  to internal nodes coincide.

We use the notation  $d(T, R)$  throughout the paper to denote the graph distance between trees in RNNI, that is,  $d(T, R)$  is the length of a shortest RNNI path between tree  $T$  and  $R$ .

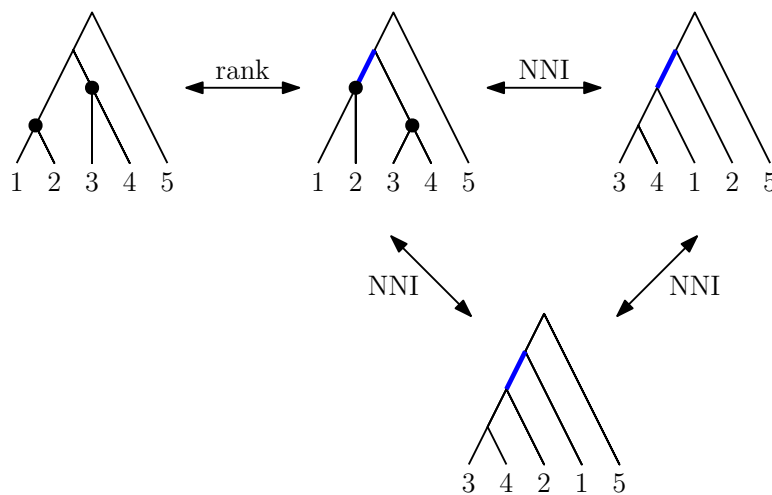

FIGURE 2. Two types of operation that define edges of the RNNI graph. The rank move swaps the rank of the two highlighted nodes and the NNI moves are performed on the blue edges.

The rest of this paper is organised as follows. In Section 1 we introduce three algorithms for exploring the RNNI graph. We use these algorithms in Section 2 to establish several geometrical properties of this graph, such as its diameter and

radius. Furthermore, we will establish in Section 2.1 that a certain subspace of RNNI is convex and design a polynomial-time algorithm for computing RNNI-distances in that subspace. This result suggests that the complexity of computing distances in RNNI is different from that in the classical NNI space. We will discuss this further in Section 2.3, where we disprove a conjecture of Gavryushkin, Whidden and Matsen (2018) and suggest its weaker versions a plausible alternatives. We will finish the paper with a discussion and open problems.

## 1. ALGORITHMS

In this section we introduce three algorithms, `FINDPATH` (Section 1.1), `CATERPILLAR SORT` (Section 1.2), and `MDTREE` (Section 1.3). `FINDPATH` computes an RNNI path between trees. `CATERPILLAR SORT` computes a shortest RNNI path between caterpillar trees (also known as ladder trees, see later in this section for accurate definitions). `MDTREE` maximises the dissimilarity to find a remote tree given an arbitrary RNNI tree. While these algorithms are interesting on their own (e.g. in simulation studies), they will also form an important ingredient to study the geometry of the RNNI space later in this paper. For example, `MDTREE` will be an important tool for finding the radius of the RNNI graph, as the algorithm computes a tree with maximum distance if the input tree is a caterpillar tree. We will prove this fact in Section 2.2.

The algorithm `FINDPATH` can be used to approximate the RNNI distance. We will study the accuracy of this approximation by computing the exact RNNI distance for small trees. Specifically, we will use the algorithm for computing the complete RNNI graph that is given in (Gavryushkin, Whidden and Matsen 2018, Section 3.3). After pre-computing the graph, we use Seidel’s algorithm (Seidel 1995) for computing distances. However, the large number of vertices in RNNI is an obstacle when it comes to computing distances for larger trees. Since there are  $\frac{n!(n-1)!}{2^{n-1}}$  vertices in the RNNI graph (Gavryushkin, Whidden and Matsen 2018), we compute the RNNI graph on up to seven taxa for our analyses. This computational result will also be used later in the paper to support Conjecture 10, a modification of Conjecture 9 in (Gavryushkin, Whidden and Matsen 2018), which we prove to be false in this paper.

Note that RNNI space on trees with seven taxa is a challenging goal to achieve computationally. For example, Whidden and Matsen (2016) were able to achieve up to seven taxa in the much smaller RNNI space, when it required considering pairs of trees. We have implemented all our algorithms in a combination of Python and C, and the source code is available at (Collienne, Elmes and Gavryushkin 2019).

**1.1. `FINDPATH`.** In this section we present `FINDPATH`, an efficient algorithm for computing paths, and therefore approximating distances, between trees in RNNI.

Before introducing the algorithm we need the following definitions. Each node  $v$  of a tree defines a *cluster*  $C$ , which is the set of taxa descending from  $v$ . We then say that  $v$  *induces*  $C$ . All trees on  $n$  leaves share trivial clusters, which are those induced by leaves and the root, so we exclude them from consideration and say cluster to mean a non-trivial cluster. A tree is unambiguously defined by the list of its clusters sorted according to the rank of the inducing nodes. We will refer to this list of  $n - 2$  clusters for a given tree on  $n$  taxa as a *cluster representation* of the tree (Gavryushkin, Whidden and Matsen 2018; Gavryushkin and Drummond 2016; Semple and Steel 2003).

Let  $T$  and  $R$  be arbitrary trees and  $[C_1, \dots, C_{n-2}]$  be the cluster representation of  $R$  (the “destination” tree). Then  $C_i$  is induced by the node of rank  $i$  for  $i = 1, \dots, n-2$ . FINDPATH computes a path by iteratively extending a sequence  $p$  of trees starting from  $T$ . The algorithm terminates when  $p$  is an RNNI path from  $T$  to  $R$ . At step  $k = 1, \dots, n-2$  of FINDPATH we consider the cluster  $C_k$  and extend path  $p$  as follows. We search for a node in the last tree  $T'$  of  $p$  from the previous step that induces the smallest cluster containing all elements of  $C_k$ . This node is denoted by  $\text{mrca}_{T'}(C_k)$  (short for *most recent common ancestor*). We then extend  $p$  by adding the tree obtained from  $T'$  by performing the RNNI move that decreases the rank of  $\text{mrca}_{T'}(C_k)$ . We continue extending  $p$  in this way by repeatedly performing RNNI moves until the rank of  $\text{mrca}_{T'}(C_k) = k$ , thus completing step  $k$ .

---

**Algorithm 1** FINDPATH( $T, R$ )

---

```

1:  $T' := T, p := [T'], [C_1, \dots, C_{n-2}] := R$ 
2: for  $k = 1, \dots, n-2$  do
3:   while  $\text{rank}_{T'}(\text{mrca}_{T'}(C_k)) > k$  do
4:     Update  $T'$ : Decrease  $\text{rank}_{T'}(\text{mrca}_{T'}(C_k))$  by an RNNI move
5:      $p = p + T'$ 
6: return  $p$ 

```

---

**Proposition 1.** FINDPATH is a correct deterministic algorithm.

*Proof.* It suffices to show that the update operation (line 4) is well-defined, that is the RNNI move that decreases the rank of  $\text{mrca}_{T'}(C_k)$  is unique.

Case  $k = 1$ . In this case  $C_k$  consists of two taxa  $\{x, y\}$ . The node  $v = \text{mrca}_{T'}(x, y)$  has  $\text{rank}_{T'}(v) = r > 1$ . Consider the node  $w$  preceding  $v$  in  $T'$ , that is,  $\text{rank}_{T'}(w) = r - 1$ . If a rank move that swaps  $v$  and  $w$  is possible then this is the only move on  $T'$  that can decrease the rank of  $\text{mrca}(x, y)$ . If the rank move is impossible then there is an edge in  $T'$  connecting  $v$  and  $w$ . The only way to decrease the rank of  $\text{mrca}(x, y)$  then is to perform an NNI move on that edge. It is not hard to see that out of two possible NNI moves only one decreases the rank of  $\text{mrca}$ .

Case  $k > 1$ .

- (1)  $C_k = C_i \cup C_j$  for  $i, j < k$ . Suppress  $C_i$  and  $C_j$  in both  $T'$  and  $R$  to new taxa  $c_i$  and  $c_j$  respectively and proceed as in Case  $k = 1$ .
- (2)  $C_k = C_i \cup x$ , where  $x$  is a taxon not present in  $C_1, \dots, C_k$ . Suppress  $C_i$  in both  $T'$  and  $R$  to a new taxon  $c_i$  and proceed as in Case  $k = 1$ .
- (3)  $C_k = \{x, y\}$  where both  $x$  and  $y$  are not in  $C_1, \dots, C_k$ . Proceed as in Case  $k = 1$ .

□

Clearly, the worst-case complexity of FINDPATH is quadratic in the number of taxa.

Because the algorithm returns a path between pairs of trees in RNNI, the length of the path approximates the RNNI distance from above. A natural question then is how accurate this approximation is. We have computationally shown that the algorithm FINDPATH finds the correct distance for trees up to seven taxa (Collienne, Elmes and Gavryushkin 2019).

**1.2. CATERPILLAR SORT.** In this section we introduce an algorithm to compute paths between *caterpillar trees*, which are trees where each internal node is adjacent to at least one leaf. As a result caterpillar trees have only one *cherry*, which is a pair of taxa that share their parent. A path between two caterpillar trees that only consists of caterpillar trees is called a *caterpillar path*. We can identify a caterpillar tree  $T = [\{x_1, x_2\}, \{x_1, x_2, x_3\}, \dots, \{x_1, \dots, x_n\}]$  with the list of its taxa  $[x_1, x_2, \dots, x_n]$ , assuming that  $x_1 < x_2$  as natural numbers (recall that the set of taxa is  $\{1, \dots, n\}$ ).

The algorithm CATERPILLAR SORT (Algorithm 2) is a modification of the classical Bubble Sort algorithm (Knuth 1997). A path  $p$  from  $T$  to  $R = [x_1, \dots, x_n]$  is computed iteratively so that after  $k$  steps the last  $k$  taxa of  $T$  and  $R$  coincide. Specifically, in step  $k$  ( $k = n, \dots, 3$ ) the parent of taxon  $x_k$  is moved up by NNI moves to the position it has in  $R$ . Notice that there might be more than just one such move per step, which means that  $p$  can be extended by more than one tree in each step.

---

**Algorithm 2** CATERPILLAR SORT( $T, R$ )

---

```
1:  $[x_1, x_2, \dots, x_n] := R, T' := T, p = [T']$ 
2: for  $k = n, \dots, 3$  do
3:   for  $i = 1, \dots, k$  do
4:     if  $T'[i] = x_k$  then
5:       Update  $T'$ : swap  $T'[i]$  and  $T'[i + 1]$ 
6:        $p = p + T'$ 
7: return  $p$ 
```

---

The running time of CATERPILLAR SORT is quadratic in  $n$ .

The path  $p$  returned by CATERPILLAR SORT is a shortest caterpillar path because every tree modification on  $p$  reduces the number of inversions of taxa in  $T$  and  $R$ . Indeed, no RNNI move on caterpillar trees can reduce the number of taxa inversions by more than one, assuming that inversions with both taxa of a cherry are counted only once, that is, if both pairs of taxa  $(x, z)$  and  $(y, z)$  appear in opposite orders in  $T$  and  $R$  and  $(x, y)$  is a cherry then they are counted as one inversion. Hence any caterpillar path every move along which reduced the number of inversions is a shortest caterpillar path.

It is not obvious that the path between  $T$  and  $R$  returned by CATERPILLAR SORT has the least possible length among all RNNI paths (not only caterpillar paths), that is, the length of  $d(T, R)$ . This fact will be established in Theorem 5.

Our Python implementation of this algorithm can be accessed at (Collienne, Elmes and Gavryushkin 2019).

**1.3. MDTREE.** The idea behind this algorithm is to efficiently return a tree as far away from a given tree as possible. As we will see in Section 2.2, MDTREE achieves this goal exactly for caterpillar trees.

MDTREE (Algorithm 3) works as follows. Given an arbitrary tree  $T$ , order its taxa in a list  $L = [l_1, \dots, l_n]$  so that the ranks of their parents are non-decreasing with respect to this order. Note that this list is not uniquely determined by the tree. MDTREE constructs an output tree  $R$  as follows: Initially,  $R$  only consists of two taxa  $l_1$  and  $l_2$ , the most recent common ancestor of which will eventually be

of rank  $n - 1$ . The remaining taxa are iteratively added to  $R$  in the reversed order of  $L$  starting from  $l_n$ . At every iteration, the taxon is attached to a new internal node created on one of the existing branches in  $R$  so that this new attachment node has rank one. Note that  $R$  is not uniquely determined due to the non-deterministic choice of the attachment edge.

---

**Algorithm 3** MDTREE( $T$ )

---

- 1: Construct list  $L = [l_1, \dots, l_n]$  of all taxa ordered with respect to the ranks of their parents in  $T$
  - 2: Build tree  $R$  with two taxa  $l_1, l_2$  that are children of the root
  - 3: **for**  $i = 3, \dots, n$  **do**
  - 4: Extend  $R$  by attaching  $l_i$  to a newly created node of rank 1 on an arbitrarily chosen edge
  - 5: **return**  $R$
- 

Note that the list computed in Line 1 of MDTREE, as well as the attachment edge of the new taxon in Line 4 are not uniquely determined. Therefore, this algorithm is non-deterministic, which is an important observation that we will use for finding the radius of RNNI in Section 2.2.

## 2. GEOMETRY OF RNNI

The study of shortest paths in the RNNI graph in this section is motivated by our aim to understand the geometry of RNNI as a metric space. We will employ the algorithms developed in the previous section to aid our analysis of shortest paths. Those algorithms will, for example, enable us to prove that every pair of caterpillar trees  $T$  and  $R$  is connected by a caterpillar path of length  $d(T, R)$  (Theorem 5 in Section 2.1). In other words, the set of caterpillar trees is *convex* in RNNI. In Section 2.2 we will investigate the diameter and radius of the RNNI space. Interestingly, the *diameter* of RNNI, that is the maximum distance  $\Delta(\text{RNNI}) = \max\{d(T, R) \mid T, R \in \text{RNNI}\}$  between any two trees in the graph, equals its *radius* defined as  $\min_T \max_R d(T, R)$ . Next, we will consider the so-called Split Theorem (Gavryushkin, Whidden and Matsen 2018), which states that every shared split of taxa is maintained along every shortest path. Recall that a *split* is a bipartition of the set of taxa obtained by deleting an edge of the tree  $T$ , splits are denoted by  $A|B$ . We will give a counterexample to the Split Theorem in RNNI and consider a variant of the Weak Split Theorem, which states that every shared split of taxa is maintained along a shortest path. We will also consider the so-called Clade Theorem as another weak version of the Split Theorem (see Conjecture 10).

We start with the following auxiliary results.

**Lemma 2.**  $\Delta(\text{RNNI}) \leq \frac{(n-1)(n-2)}{2}$  for  $n \geq 3$ .

*Proof.* Since the diameter is bounded from above by the maximum length of a path computed by FINDPATH, it is enough to find this maximum. Let us assume that  $T$  and  $R = [C_1, \dots, C_{n-2}]$  are trees for which FINDPATH computes a path of maximum length. It follows that in each step of FINDPATH the most recent common ancestor of the cluster  $C_k$  considered in that step is the root. Thus, there are  $n - 1 - k$  RNNI

operations necessary to move  $C_k$  to its correct position. Hence, the maximum length of a path computed by FINDPATH is bounded by  $\sum_{i=1}^{n-2} (n-1-i) = \frac{(n-2)(n-1)}{2}$ .  $\square$

The following lemma relates distances between trees on  $n$  and  $n+1$  taxa and is an important tool for inductive arguments. We use the notion  $\text{parent}_T(x)$  to refer to the node adjacent to taxon  $x$  in tree  $T$ .  $T|_n$  denotes the restriction of tree  $T$  to the set of taxa  $\{1, \dots, n\}$ . In particular if  $T$  is a tree on taxa  $\{1, \dots, n+1\}$  the tree  $T|_n$  is obtained by deleting taxon  $n+1$  and suppressing the thereby created node of degree two.

**Lemma 3.** *Let  $T$  and  $R$  be two trees on taxa  $\{1, \dots, n+1\}$ . Then  $d(T|_n, R|_n) \leq d(T, R) - \delta$ , where  $\delta = |\text{rank}_T(\text{parent}_T(n+1)) - \text{rank}_R(\text{parent}_R(n+1))|$ .*

*Proof.* First observe that the rank of the internal node  $\text{parent}_T(n+1)$  can only be changed by performing a rank move that involves  $\text{parent}_T(n+1)$  or an NNI move on an edge adjacent to  $\text{parent}_T(n+1)$ . Second observe that any RNNI move can change the rank of  $\text{parent}_T(n+1)$  by at most one. Hence an RNNI move on  $T$  can decrease the rank of  $\text{parent}_T(n+1)$  by at most one.

Let  $p$  be a shortest path from  $T$  to  $R$  and  $p|_n$  the path resulting from deleting taxon  $n+1$  from all trees on  $p$ . Then  $p|_n$  is a path from  $T|_n$  to  $R|_n$ . Recall that  $\delta$  is the difference in ranks between the parents of taxon  $n+1$  in  $T$  and  $R$ . Combining this with the observations above, we conclude that  $|p|_n| \leq |p| - \delta$ . Since  $d(T|_n, R|_n) \leq |p|_n|$  and  $|p| = d(T, R)$ , the desired inequality follows.  $\square$

**2.1. The set of caterpillar trees.** In this section we restrict our attention to the set of caterpillar trees. These trees are of particular interest because they are used to prove that computing the NNI distance is an NP-hard problem. As we will see below, shortest paths between caterpillar trees in RNNI differ from those in the classical NNI space. We will show later in this section that RNNI distances between caterpillar trees can be computed in polynomial time. Throughout this section we use the list representation of trees described in Section 1.2.

Recall (Gavryushkin, Whidden and Matsen 2018) that computing a shortest path between two caterpillar trees in NNI sometimes requires first building a clade and then moving the clade around the tree (see Figure 3). In RNNI however, the necessity of additional rank moves invalidates this strategy. This is due to the fact that NNI moves in RNNI are only allowed on edges of length one.



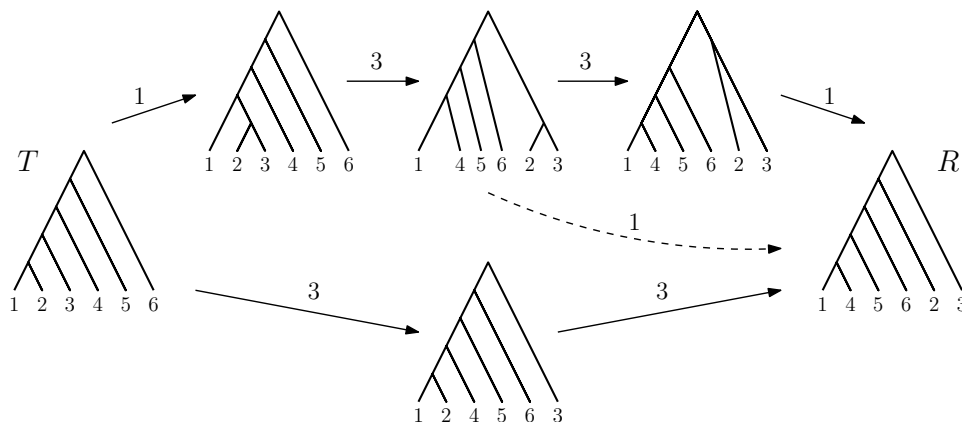

FIGURE 3. Paths between caterpillar trees  $T$  and  $R$ : Solid arrows indicate paths in RNNI, the dashed arrow is a move only possible in NNI. The bottom path is a shortest RNNI path.

These observations motivate the following general result. Every pair of trees  $T, R$  in RNNI are connected by a caterpillar path of length  $d(T, R)$ , that is, the set of caterpillar trees is convex in RNNI (Theorem 5). Note that this is not true in the NNI space (Figure 3).

We need the following lemma. Recall that  $\frac{(n-1)(n-2)}{2}$  is the upper bound of the diameter of RNNI by Lemma 2.

**Lemma 4.** *Let  $T$  and  $R$  be two caterpillar trees. Then  $d(T, R) = \frac{(n-1)(n-2)}{2}$  if and only if  $d_c(T, R) = \frac{(n-1)(n-2)}{2}$ , where  $d_c$  is the length of a shortest caterpillar path.*

*Proof.* First note that  $d(T, R) = \frac{(n-1)(n-2)}{2}$  implies  $d_c(T, R) = \frac{(n-1)(n-2)}{2}$ . Indeed, in each step  $i = 0, \dots, n-3$  of CATERPILLAR SORT at most  $n-2-i$  pairs of taxa swap positions, as in the worst case the taxon considered in step  $k$  is moved from the cherry of the tree up to the position  $n-k$ . It follows that the maximum length of a path computed by CATERPILLAR SORT is

$$(1) \quad \sum_{i=0}^{n-3} n-2-i = \frac{(n-1)(n-2)}{2}.$$

For proving the other direction of the statement, assume that  $d_c(T, R) = \frac{(n-1)(n-2)}{2}$ . We prove that  $d(T, R) = \frac{(n-1)(n-2)}{2}$  by induction on the number of taxa  $n$ . The induction basis for  $n = 3$  taxa is trivial as the RNNI graph is a triangle on three caterpillar trees in that case.

For the induction step we assume without loss of generality that  $T$  is the caterpillar tree  $[1, \dots, n+1]$  and  $R$  is a caterpillar tree such that  $d_c(T, R) = \frac{n(n-1)}{2}$ . Consider the path  $p = \text{CATERPILLAR SORT}(T, R)$  of this length. Note that in this case taxon  $n+1$  has to be in the cherry of  $R$ , as otherwise CATERPILLAR SORT would find a path between  $T$  and  $R$  of length strictly less than  $\frac{n(n-1)}{2}$ , which can be shown by counting the number of moves as in (1) above.

Let us now consider the path  $p|_n$  from  $T|_n$  to  $R|_n$ , which is obtained by restricting every tree on  $p$  to taxa  $1, \dots, n$  and removing identical trees. Observe that this path is shorter than  $p$  by the number of moves that involve taxon  $n + 1$ . Since this taxon is adjacent to the root in  $T$  and part of the cherry in  $R$ , CATERPILLAR SORT requires  $n - 1$  such moves. Hence,  $d_c(T|_n, R|_n) = \frac{n(n-1)}{2} - (n - 1) = \frac{(n-1)(n-2)}{2} = d(T|_n, R|_n)$ , by induction. Lemma 3 implies that  $d(T|_n, R|_n) \leq d(T, R) - |\text{rank}_T(\text{parent}_T(n + 1)) - \text{rank}_R(\text{parent}_R(n + 1))| = d(T, R) - (n - 1)$ . So  $\frac{(n-1)(n-2)}{2} \leq d(T, R) - (n - 1)$ , which implies that  $d(T, R) \geq \frac{n(n-1)}{2}$ . Thus  $d(T, R) = \frac{n(n-1)}{2}$ .  $\square$

**Theorem 5.** *The set of caterpillar trees is convex in RNNI.*

*Proof.* Note that it is suffice to prove that  $d_c(T, R) = d(T, R)$  for an arbitrary pair of caterpillar trees  $T$  and  $R$ . Lemma 4 implies that if  $T$  and  $R$  are at the maximal possible distance, that is,  $d_c(T, R) = \frac{(n-1)(n-2)}{2}$ . Denote the latter number by  $D$ .

Assume now that  $d_c(T, R) = D - 1$ . If we apply CATERPILLAR SORT( $T, R$ ) in this case, there must be a step in the algorithm where the taxon that is moved up is not part of the cherry (of  $T'$ ) at the beginning of this step. Let  $x$  be the first taxon that has this property and is considered at step  $k$ . Then there must be a taxon  $y$  that is immediately preceding  $x$  in the tree at the beginning of step  $k$ . Since  $k$  is the first such step,  $y$  must be preceding  $x$  in tree  $T$  as well. Consider a tree  $\hat{T}$  that is obtained from  $T$  by exchanging  $x$  and  $y$ . Note that the caterpillar path from  $\hat{T}$  to  $R$  computed by CATERPILLAR SORT passes  $T$  and coincides with the path CATERPILLAR SORT( $T, R$ ) from there on. Clearly,  $d_c(\hat{T}, R) = D$ .

Assuming  $d_c(T, R) < D$ , we can iterate the construction above to find a tree  $\hat{T}$  such that  $d_c(\hat{T}, R) = D$  and the caterpillar path from  $\hat{T}$  to  $R$  computed by CATERPILLAR SORT passes  $T$  and coincides with the path CATERPILLAR SORT( $T, R$ ) from there on. Lemma 4 implies that  $d(\hat{T}, R) = D$ .

Assume that  $d(T, R) < d_c(T, R)$  and let  $p$  be a path from  $T$  to  $R$  of length  $d(T, R)$ . Consider a path  $q$  obtained by concatenating paths CATERPILLAR SORT( $\hat{T}, T$ ) and  $p$ . Note that  $q$  is a path from  $\hat{T}$  to  $R$  which is shorter than CATERPILLAR SORT( $\hat{T}, R$ ). Indeed, the two paths coincide between  $\hat{T}$  and  $T$  and  $q$  is shorter between  $T$  and  $R$ . Since  $d_c(\hat{T}, R) = D$ , the existence of  $q$  is a contradiction to Lemma 4.  $\square$

**2.2. Diameter and radius.** Gavryushkin, Whidden and Matsen (2018, Theorem 7) gave an upper bound for the diameter of RNNI space, which we recall is denoted by  $\Delta(\text{RNNI})$ . They showed that  $\Delta(\text{RNNI}) = n^2 - 3n - 5/8$ . In this section we improve that result and calculate the exact diameter and radius of the RNNI space.

**Theorem 6.**  $\Delta(\text{RNNI}) = \frac{(n-1)(n-2)}{2}$ .

*Proof.* Since  $d_c([1 \dots, n], [n-1, n, n-2, n-3, \dots, 1]) = \frac{(n-1)(n-2)}{2}$ , the claim follows directly from from Theorem 5 and Lemma 2.  $\square$

We show in the rest of this section that the radius of RNNI space coincides with its diameter. The main tool to establish this result is the algorithm MDTREE from Section 1.3. Recall that MDTREE is a non-deterministic algorithm, which implies that the output tree is not uniquely defined by the input to the algorithm.

**Lemma 7.** *Let  $T$  be a caterpillar tree. Then  $d(T, R) = \Delta(\text{RNNI})$  for every tree  $R$  such that  $R = \text{MDTREE}(T)$ .*

*Proof.* We prove the lemma by induction on the number of taxa  $n$ . The induction basis for  $n = 3$  is trivial.

Assume now that  $T = [1, \dots, n + 1]$ . In this case, the parent of taxon  $n + 1$  has rank  $n$  in  $T$  and rank 1 in  $R$ . Lemma 3 then implies that

$$(2) \quad d(T|_n, R|_n) \leq d(T, R) - (n - 1).$$

Note that  $R|_n = \text{MDTREE}(T|_n)$  for an appropriate choice of attachment points in the execution of  $\text{MDTREE}$ . By induction hypothesis and Theorem 6,  $d(T|_n, R|_n) = \frac{(n-1)(n-2)}{2}$ . So inequality (2) becomes  $d(T, R) \geq \frac{(n-1)(n-2)}{2} + n - 1 = \frac{n(n-1)}{2}$ , which with Theorem 6 gives the desired equality.  $\square$

The non-determinism of  $\text{MDTREE}$  can be exploited to investigate what trees are at the maximal possible from a given caterpillar tree. In fact, those trees can have an arbitrary (non-ranked) topology! This is because in each step of the algorithm the next taxon can be added on any edge incident to a leaf in the running tree. Therefore, if the input tree is a caterpillar tree,  $\text{MDTREE}$  can be used to find a tree of pre-defined topology that is at the maximal possible distance from the input tree. Because the distance between trees is invariant under permutations of taxa labels, we conclude that for every tree  $R$  on  $n$  taxa there exists a caterpillar tree  $T$  such that  $d(T, R) = \Delta(\text{RNNI}) = \frac{(n-1)(n-2)}{2}$ . This proves the following Theorem 8.

**Theorem 8.** *The radius and diameter of the RNNI space coincide and are equal to  $\frac{(n-1)(n-2)}{2}$ .*

**2.3. Cluster Theorem.** In this section we discuss the so-called Split Theorem, which states that every split shared between two trees is maintained along shortest paths between the trees. For example, Split Theorem is true in the SPR space and false in NNI (Li, Tromp and Zhang 1996). Specifically, in NNI there exist two trees  $T$  and  $R$ , which share a split  $A|B$ , such that every tree on every shortest path between  $T$  and  $R$  does not have  $A|B$ .

To construct this example, Li, Tromp and Zhang (1996) used the idea illustrated in Figure 4 and showed that for an appropriate permutation of the taxa in the two caterpillar subtrees of both  $T$  and  $R$ , it is strictly shorter to merge the two caterpillar subtrees first, then sort them simultaneously, and then split back to two caterpillar subtrees, rather than the two caterpillar subtrees independently.

The reason this example cannot be transferred to RNNI is that additional rank moves are necessary to merge and then split the two caterpillar subtrees. Similarly to the example in Figure 3, adding rank moves to the shortest NNI path from  $T$  to  $R$  results in a path that is no longer a shortest RNNI path. Sorting the two caterpillar subtrees of  $T$  and  $R$  independently results in a shorter path in RNNI.

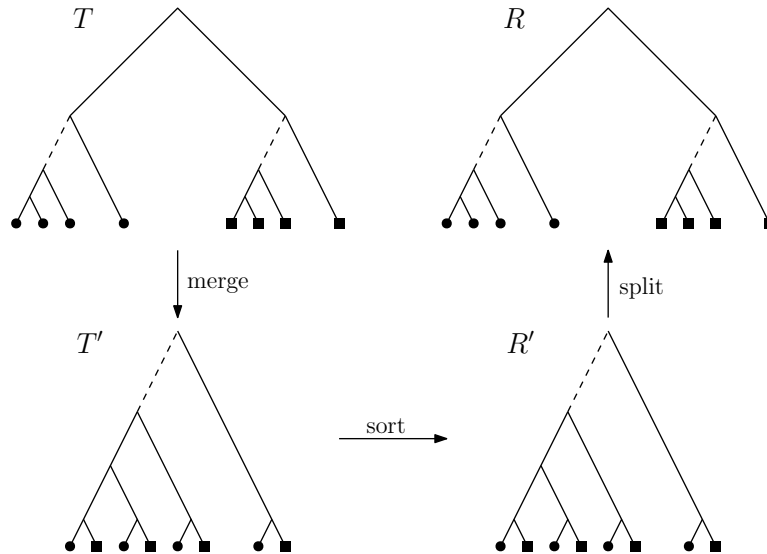

FIGURE 4. Example of a shortest path between two trees  $T$  and  $R$  in NNI. In (Li, Tromp and Zhang 1996) it is proven that there is a labelling that ensures that there is no shortest path in NNI where the clusters (dots vs. squares) shared between  $T$  and  $R$  are preserved. Instead, the depicted path where  $\frac{n}{2}$  cherries are built and then sorted before being resolved is a shortest path

This argument motivated Gavryushkin, Whidden and Matsen (2018, Conjecture 9) to conjecture that every split shared between trees in RNNI is maintained along every shortest path.

The following example in Figure 5 shows that this form of the Split Theorem does not hold.

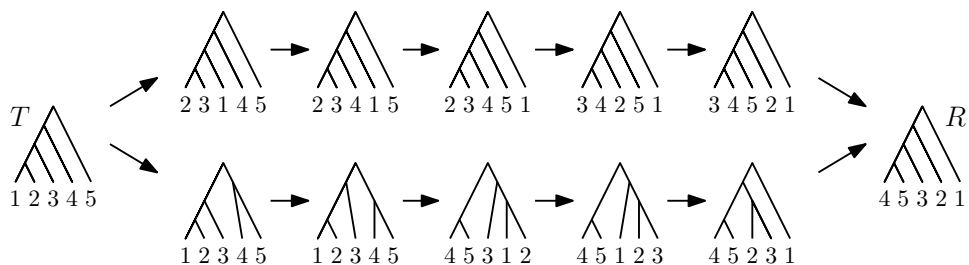

FIGURE 5. The split  $123|45$  is present in  $T$  and  $R$ , but the path at the top is a shortest path (computed by CATERPILLAR SORT) where none of the trees contains this split. On the path at the bottom, which is a shortest path as well, this split is maintained.

Hence not every shortest path between trees in RNNI has to maintain every shared split of taxa. However, **there exists** still another shortest path connecting the two trees, along which every shared split is maintained. This motivates the study of the following Weak Split Theorem in RNNI.

**Conjecture 9** (Weak Split Theorem). *If a split of taxa  $A|B$  is shared by two trees  $T$  and  $R$  in RNNI then there exists a shortest path  $p$  between  $T$  and  $R$  such that all trees on  $p$  share the split  $A|B$ .*

Another interesting property of our counterexample in Figure 5 is that the set of taxa  $\{1, 2, 3\}$ , which is a part of the split in both  $T$  and  $R$ , does not form a **cluster** in  $R$ , that is, there is no single node in the tree all descended taxa of which are exactly 1, 2, and 3. Importantly, rooted phylogenetic trees can be uniquely represented by sets of clusters (Steel 2016), but not by sets of splits as splits cannot define the position of the root. For example, trees  $T$  and  $R$  in Figure 5 induce the same set of splits, but share no cluster.

Furthermore, all our methods in this paper for computing shortest paths in special subspaces of RNNI demonstrate that shared clusters are maintained along shortest paths.

These considerations motivate us to conjecture the following strong version of the Cluster Theorem.

**Conjecture 10** (Cluster Theorem). *Let  $T$  and  $R$  be trees in RNNI that share a cluster  $C$ . Then  $C$  is present as a cluster in every tree on every shortest path between  $T$  and  $R$ .*

We have computationally checked that this conjecture is true in RNNI spaces with up to seven taxa ( $n = 2, \dots, 7$ ). Specifically, we computed subgraphs of RNNI containing only trees with shared clusters and compared distances in this subgraph with distances in the whole RNNI graph. We computed these graphs according to the algorithm from (Gavryushkin, Whidden and Matsen 2018) as discussed in Section 1. The source code of all these implementations can be openly accessed at (Collienne, Elmes and Gavryushkin 2019).

### 3. DISCUSSION

The problem of computing distances in all common phylogenetic graphs, including NNI (Dasgupta et al. 2000), SPR (Bordewich and Semple 2005), and TBR (Allen and Steel 2001), is  $\mathcal{NP}$ -hard. Although  $\mathcal{NP}$ -hardness does not necessarily imply practical impossibility, this so far has been the case for these phylogenetic algorithms with extremely few major advances (Whidden, Beiko and Zeh 2010). NNI is especially known for its algorithmic hardness (Whidden and Matsen 2018).

Our results suggest a surprising advance in this field of  $\mathcal{NP}$ -problems – adding ranking information to trees simplifies some of the algorithms and makes some un-intuitive counterexamples impossible. We hence continued the investigation of the RNNI graph on ranked phylogenetic trees in this paper. We have taken the route of comparing the classic NNI with the RNNI graph, so have mostly been concentrating on questions that are settled in NNI. Specifically, we have considered a number of geometric properties, including the diameter, radius, convexity of caterpillar trees, and the Split Theorem. We have also justified that the technique of Dasgupta et al. (2000) to prove that distances in NNI are  $\mathcal{NP}$ -hard to compute cannot be directly

applied in RNNI. This led us to the Cluster Theorem, a statement that does not hold in NNI. All our algorithms and methods developed in this paper witness in favour of the Cluster Theorem being true in RNNI. For example, we have checked the statement computationally for up to seven taxa (Collienne, Elmes and Gavryushkin 2019). Although the Split Theorem is true in SPR, it is still  $\mathcal{NP}$ -hard to compute distances in that graph. Hence Cluster Theorem alone cannot be used as an argument in favour of the distance problem having an efficient solution in RNNI. But the greedy nature of all our algorithms for computing shortest paths in RNNI developed in this paper does provide such an argument.

The algorithms we developed and implemented in this paper have served as a main ingredient for our study of the geometry of RNNI space. These algorithms are of interest on their own as well. For example, our FINDPATH algorithm gives a good approximation of the RNNI distance, performing exactly on small trees. We are not aware of the minimal number of taxa where this algorithm fails to return the correct distance. The MDTREE algorithm produces trees as far away from a given tree as possible, a task of importance in simulation and model comparison studies. The CATERPILLAR SORT algorithm efficiently computes the RNNI distance and shortest paths between caterpillar trees exactly. To the best of our knowledge no such algorithm exists for NNI. This implies that the algorithmic complexity of computing distances in NNI is higher than in RNNI.

The question of whether computing RNNI distances is  $\mathcal{NP}$ -hard is still open.

#### ACKNOWLEDGEMENTS

We thank Charles Semple for useful discussions about the Cluster Theorem.

We acknowledge support from the Royal Society of New Zealand through the Rutherford Discovery Fellowship (RDF-UOO1702) awarded to AG. This work was partially supported by the Ministry of Business, Innovation, and Employment of New Zealand through the Endeavour Smart Ideas (CONT-61378-ENDSI-UOO) and Data Science Programmes grants.

MF thanks the joint research project *DIG-IT!* supported by the European Social Fund (ESF), reference: ESF/14-BM-A55-0017/19, and the Ministry of Education, Science, and Culture of Mecklenburg-Vorpommern, Germany, for funding parts of this work.

Part of this work was done while AG, LC, and MF were visiting Max Planck Institute for Evolutionary Biology, we appreciate their support.

#### REFERENCES

- Allen, BL and M Steel (June 2001). ‘Subtree Transfer Operations and Their Induced Metrics on Evolutionary Trees’. *Ann. Comb.* 5.1, pp. 1–15.
- Bordewich, M and C Semple (2005). ‘On the Computational Complexity of the Rooted Subtree Prune and Regraft Distance’. *Ann. Comb.* 8.4, pp. 409–423.
- Bouckaert, R et al. (Nov. 2018). ‘BEAST 2.5: An Advanced Software Platform for Bayesian Evolutionary Analysis’.
- Collienne, L, K Elmes and A Gavryushkin (2019). *RNNI code*. [https://github.com/bioDS/RNNI\\_code](https://github.com/bioDS/RNNI_code).

- Dasgupta, B et al. (2000). ‘On computing the nearest neighbor interchange distance’. *Discrete Mathematical Problems with Medical Applications: DIMACS Workshop Discrete Mathematical Problems with Medical Applications, December 8-10, 1999, DIMACS Center*. Vol. 55. American Mathematical Soc., p. 19.
- Drummond, AJ, SYW Ho, MJ Phillips and A Rambaut (May 2006). ‘Relaxed phylogenetics and dating with confidence’. *PLoS Biol.* 4.5, e88.
- Drummond, AJ and MA Suchard (Aug. 2010). ‘Bayesian random local clocks, or one rate to rule them all’. *BMC Biol.* 8, p. 114.
- Gavryushkin, A and AJ Drummond (Aug. 2016). ‘The space of ultrametric phylogenetic trees’. *J. Theor. Biol.* 403, pp. 197–208.
- Gavryushkin, A, C Whidden and FA Matsen IV (Apr. 2018). ‘The combinatorics of discrete time-trees: theory and open problems’. *J. Math. Biol.* 76.5, pp. 1101–1121.
- Gordon, K, E Ford and K St John (July 2013). ‘Hamiltonian walks of phylogenetic treespaces’. *IEEE/ACM Trans. Comput. Biol. Bioinform.* 10.4, pp. 1076–1079.
- Hadfield, J et al. (Dec. 2018). ‘Nextstrain: real-time tracking of pathogen evolution’. *Bioinformatics* 34.23, pp. 4121–4123.
- Jong, JV de, JC McLeod and M Steel (Jan. 2016). ‘Neighborhoods of Phylogenetic Trees: Exact and Asymptotic Counts’. *SIAM J. Discrete Math.* 30.4, pp. 2265–2287.
- Knuth, DE (1997). *The art of computer programming*. Vol. 3. Pearson Education.
- Li, M, J Tromp and L Zhang (June 1996). ‘Some notes on the nearest neighbour interchange distance’. *Computing and Combinatorics*. Lecture Notes in Computer Science. Springer Berlin Heidelberg, pp. 343–351.
- Moore, GW, M Goodman and J Barnabas (Mar. 1973). ‘An iterative approach from the standpoint of the additive hypothesis to the dendrogram problem posed by molecular data sets’. *J. Theor. Biol.* 38.3, pp. 423–457.
- Robinson, DF (Oct. 1971). ‘Comparison of labeled trees with valency three’. *J. Combin. Theory Ser. B* 11.2, pp. 105–119.
- Ronquist, F and JP Huelsenbeck (Aug. 2003). ‘MrBayes 3: Bayesian phylogenetic inference under mixed models’. *Bioinformatics* 19.12, pp. 1572–1574.
- Seidel, R (1st Dec. 1995). ‘On the All-Pairs-Shortest-Path Problem in Unweighted Undirected Graphs’. *Journal of Computer and System Sciences* 51.3, pp. 400–403. ISSN: 0022-0000. DOI: 10.1006/jcss.1995.1078. (Visited on 08/12/2019).
- Semple, C and M Steel (2003). *Phylogenetics*. Oxford University Press.
- Steel, M (Sept. 2016). *Phylogeny: Discrete and Random Processes in Evolution*. SIAM-Society for Industrial and Applied Mathematics.
- Whidden, C, RG Beiko and N Zeh (2010). ‘Fast FPT Algorithms for Computing Rooted Agreement Forests: Theory and Experiments’. *Experimental Algorithms*. Lecture Notes in Computer Science. Springer Berlin Heidelberg, pp. 141–153.
- Whidden, C and F Matsen (Feb. 2018). ‘Calculating the Unrooted Subtree Prune-and-Regraft Distance’. *IEEE/ACM Trans. Comput. Biol. Bioinform.*
- Whidden, C and FA Matsen IV (2016). ‘Ricci-Ollivier Curvature of the Rooted Phylogenetic Subtree-Prune-Regraft Graph’. *Proceedings of the Thirteenth Workshop on Analytic Algorithmics and Combinatorics (ANALCO16)*, pp. 106–120.
- Yoder, AD and Z Yang (July 2000). ‘Estimation of primate speciation dates using local molecular clocks’. *Mol. Biol. Evol.* 17.7, pp. 1081–1090.
